# Supplementary material
Source: PubMed Central journal article supplement (PMC5422801)

## The Hippo pathway mediates resistance to cytotoxic drugs

Taranjit S. Gujral<sup>1,2</sup>, and Marc W. Kirschner<sup>1\*</sup>

<sup>1</sup>Department of Systems Biology, Harvard Medical School, Boston, MA

<sup>2</sup>Current address: Division of Human Biology, Fred Hutchinson Cancer Research Center, Seattle, WA.

\* Corresponding author. E-mail: [marc@hms.harvard.edu](mailto:marc@hms.harvard.edu)

**Running title:** Hippo pathway mediates drug sensitivity

**Keywords:** Hippo pathway/YAP/drug resistance/ transporters/gemcitabine

This supplementary file includes:

Supplementary Figures S1, S2, S3, S4, S5, S6, S7, S8

Supplementary Tables S1, S2, S3, S4

## Extended Experimental Procedures

### *Antibodies*

Primary antibodies were obtained from the following sources: rabbit phospho-YAP (S127) (Cell Signaling Technology, Beverly, MA; cat. # 13008), rabbit anti-YAP (Cell Signaling Technology, Beverly, MA; cat. # 14074), mouse anti- $\beta$ -actin (Sigma-Aldrich, Inc., St. Louis, MO; cat. #A1978).

### *Reverse-Phase Protein Microarray*

Cell lysates prepared from various pancreatic cancer cell lines were printed using Aushon 2470 Arrayer (Aushon Biosystems). Validation of antibodies, staining, and analysis of array data was performed as described previously (1).

### *3D spheroid assay*

Cancer cell lines were seeded at a  $5 \times 10^4$  cells per well in 96-well ultra-low adherence plates (Costar) and briefly spun down at 1000rpm for 5 minutes. After 2 days, cells were treated with small molecule inhibitors at varying concentrations. Growth of spheroids was monitored using live cell imaging every 2-3 hours for 4-7 days in the Incucyte ZOOM system (Essen) or as end point assay using CellTiter-Glo luminescent cell viability assay (Promega).

### *Generation of YAPS6A overexpression cell lines*

Cell lines (Panc02.13, Panc10.05 or Miapaca2) were transfected with YAPS6A constructs (Addgene plasmid #42562) using Lipofectamine (Invitrogen, Carlsbad, CA) following the manufacturer's instructions and 48 hour post-transfection selected in 5-10  $\mu\text{g}/\text{ml}$  Blasticidin (InvivoGen, San Diego, CA). The clones screened for YAPS6A expression by Western blot. Stable cell lines were maintained in complete medium and 5  $\mu\text{g}/\text{ml}$  Blasticidin.

### *RNA extraction and quantitative real-time PCR*

Cells were serum-starved for 24 h and total cellular RNA was isolated using an RNeasy Mini Kit (QIAGEN, Santa Clara, CA). mRNA levels for the EMT-related genes were determined using the RT<sup>2</sup> profiler™ qPCR array (SA Biosciences Corporation, Frederick, MD). Briefly, 1  $\mu\text{g}$  of total RNA was reverse transcribed into first strand cDNA using an RT<sup>2</sup> First Strand Kit (SA Biosciences). The resulting cDNA was subjected to qPCR using human gene-specific primers for 75 different genes, and five housekeeping genes (B2M, HPRT1, RPL13A, GAPDH, and ACTB). The qPCR reaction was performed with an initial denaturation step of 10 min at 95°C, followed by 15 s at 95°C and 60 s at 60°C for 40 cycles using an Mx3000P™ QPCR system (Stratagene, La Jolla, CA).

The mRNA levels of each gene were normalized relative to the mean levels of the five housekeeping genes and compared with the data obtained from unstimulated, serum-starved cells using the  $2^{-\Delta\Delta\text{Ct}}$  method. According to this method, the normalized level of a mRNA, X, is determined using equation 1: (1)

$$X = 2^{-Ct(\text{GOI})/2^{-Ct(\text{CTL})}} \quad (1)$$

where Ct is the threshold cycle (the number of the cycle at which an increase in reporter fluorescence above a baseline signal is detected), GOI refers to the gene of interest, and CTL refers to a control housekeeping gene. This method assumes that Ct is inversely proportional to the initial concentration of mRNA and that the amount of product doubles with every cycle.

### ***Protein isolation and quantitative western blotting***

Cells were rinsed in Phosphate Buffered Saline (PBS) and lysed in Lysis Buffer (20 mM Tris-HCl, 150 mM NaCl, 1% Triton X-100 (v/v), 2 mM EDTA, pH 7.8 supplemented with 1 mM sodium orthovanadate, 1 mM phenylmethylsulfonyl fluoride (PMSF), 10 µg/mL aprotinin, and 10 µg/mL leupeptin). Protein concentrations were determined using the BCA protein assay (Pierce, Rockford, IL) and immunoblotting experiments were performed using standard procedures. For quantitative immunoblots, primary antibodies were detected with IRDye 680-labeled goat-anti-rabbit IgG or IRDye 800-labeled goat-anti-mouse IgG (LI-COR Biosciences, Lincoln, NE) at 1:5000 dilution. Bands were visualized and quantified using an Odyssey Infrared Imaging System (LI-COR Biosciences).

### ***Kaplan-Meier Survival Analysis***

Kaplan Meier survival curves of pancreatic cancer patients were generated using PROGgene using combined signature graph function and Kaplan Meier plotter web-based tools (2-4).

### ***Confocal imaging***

Panc02.13 cells were cultured on Lab-Tek II chamber glass slides (Nalge Nunc, Naperville, IL) or on 24-well glass bottom dishes (MatTek Corporation). Cells were fixed in 4% paraformaldehyde for 15 min at room temperature, washed in PBS, permeabilized with 0.1% Triton X-100, and blocked for 60 min with PBS containing 3% BSA (w/v). Cells were immunostained with the appropriate antibody, following by immunostaining with Alexa Fluor 488-labeled goat-anti-rabbit antibody (Molecular Probes, Eugene, OR). Nuclei were counterstained with Hoescht 33342 (Sigma-Aldrich, St. Louis, MO). Fluorescent micrographs were obtained using a Nikon A1R point scanning confocal microscope. Individual channels were overlaid using ImageJ software (National Institutes of Health, Bethesda, MD).

### ***Measuring gemcitabine efflux***

Panc02.13. cells expressing GFP or YAPS6A plasmid were treated with radiolabeled gemcitabine (0.5µM) for one hour. Cells were washed twice with PBS and incubated in fresh medium. Medium was collected over the time course of 24 hours and radioactivity was measured using scintillation counter.

### ***Profiling drug transporters***

mRNA expression of drug transporters was profiled using Human Drug transporters PCR Array from SA Biosciences (cat # PAHS-070Z) using manufacturer's instructions.

***Tumorigenicity in Nude Mice***

All *in vivo* experiments were performed using 6-week-old to 8-week-old athymic nude mice. Mice were maintained in laminar flow rooms with constant temperature and humidity. Miapaca2 or Panc02.13 cells were inoculated subcutaneously (s.c.) into each flank of the mice. Cells ( $2 \times 10^6$  in suspension) were injected on day 0, and tumor growth was followed every 2 to 3 days by tumor diameter measurements using vernier calipers. Tumor volumes (V) were calculated using the formula:  $V = AB^2/2$  (A, axial diameter; B, rotational diameter). When the outgrowths were ~200 mm<sup>3</sup>, mice were divided at random into two groups (control and treated, n=3-8). The treated group received gemcitabine injection or saline control on alternate days (MWF) for 2 weeks.

***Patient-derived xenograft (PDX) models***

PDX models were established by Champions Oncology (Baltimore, MD) as described previously (5). Drug response to 20 PDX models was obtained from Champions TumorGraft® Database (<http://database.championsoncology.com/>).

***Immunohistochemistry***

Human primary tumor tissue slides were obtained from Champions Oncology (Baltimore, MD). Immunohistochemistry using anti YAP1 antibody (Abcam Cat # ab52771) was performed as previously described (6). For negative controls, primary antibody was omitted. The intensity of YAP staining was assessed by an independent pathologist (Dr. Langxing Pan) using a four-grade scale: “0” is negative. “0.5” is borderline staining with no significance. “1” is weak staining. “1.5” is weak staining with foci of moderate staining. “2” is moderate staining. “2.5” is moderate staining with foci of strong staining. “3” is homogeneous strong staining. “3.5” is very strong and homogeneous staining with no significant background. “4” is over staining usually with background staining. YAP scoring index was calculated based on staining intensity \* % of positive target cells.

***Intra-tumor gemcitabine measurements***

LC-MS/MS was used to simultaneous quantification of gemcitabine, and its inactive metabolite dFdU in tumour tissue from a mouse xenograft model of pancreatic cancer as described previously (7).

## Supplementary Figures and Legends

**Fig. S1. Dose response curves of gemcitabine treated pancreatic cancer A, liver cancer and untransformed (B) cell lines.** The respective EC<sub>50</sub> for each cell line is also indicated. Growth factor stimulation of pancreatic cancer cells does not affect gemcitabine response. **C.** Bar graphs showing changes in cell viability at 72hr (top) and 96hr (bottom) post stimulation with a combination of growth factor and gemcitabine. Cells were also treated with PBS control and gemcitabine alone. **D.** Growth factor stimulation activated their cognate downstream signaling proteins. Bar graphs showing activities of six downstream signaling proteins following stimulation with 15 growth factors.

**Fig. S2. Changes in extrinsic factors do not affect gemcitabine response.** **A.** Plot showing magnesium concentration increases cell growth in Bxpc3 cells in a dose-dependent manner. **B.** High magnesium concentration (5 $\mu$ M) has no effect on gemcitabine response in high crowding conditions. Bxpc3, Aspc1 and Panc10.05 cells grown in high crowding conditions were exposed to gemcitabine and cell viability was measured using live cell imaging. **C.** Conditioned media from Panc1 or human dermal fibroblast (HDF) cells has no effect on gemcitabine response in high crowding conditions. **D.** Co-culturing of sparse GFP-labeled Pan02.13 cells achieved high overall cell density produced the same resistance to gemcitabine found in dense tumor cell culture. Cells grown in high crowding conditions do not acquire intrinsic resistance to apoptosis. **E.** A plot showing levels of 29 apoptosis-related signaling proteins in Panc02 cells grown in low crowding (LD) or high crowding conditions (HD). Levels of apoptotic proteins were measured using antibody arrays as described in materials and methods. **F.** Ultra-violet (UV)-induced apoptosis is not affected by cell crowding conditions. Panc02.13 cells grown in varying crowding conditions were exposed to medium strength UV for 10 sec. Cells were then lysed and whole cell lysates were subjected to western blotting. Western blots showing activities of cleaved caspase3, 7 and PARP.

**Fig. S3. Cell crowding-dependent response to cytotoxic drugs in pancreatic cancer.** **A.** Plots showing the effect of six cytotoxic drugs on growth of seven pancreatic cancer cell lines under sparse and dense conditions. The efficacy of gemcitabine, doxorubicin was crowding-dependent while the effects of camptothecin paclitaxel, docetaxel and oxaliplatin were largely crowding-independent. Hippo-YAP pathway is activated in pancreatic cancer cells at high crowding conditions. **B.** Plot showing changes in phosphorylation of S6 ribosomal protein with cell crowding in six different pancreatic cancer cell lines. **C.** A heatmap showing changes in phosphorylation of growth factor signaling proteins such as Akt, Erk, Mek, Src, and S6 in Aspc1 cells. **D.** Western blots showing cell crowding-dependent changes in YAP phosphorylation (S127) in four pancreatic cancer cell lines. Knockdown of YAP decreases pancreatic cell proliferation. **E.** Western blots showing knockdown of YAP using two different shRNA in three pancreatic cell lines. Blots were also probed with  $\beta$ -actin for loading control. **F.** Plots showing growth of three pancreatic cancer cell lines expressing control or shRNA targeting YAP.

**Fig. S4. Cell crowding-dependent affect of verteporfin on pancreatic cancer cell growth. A.** Verteporfin treatment potently slows down growth of Panc02.13 cells when grown in low crowding conditions. **B.** Dose response curves of Panc02.13 cells treated with verteporfin, gemcitabine or combination of verteporfin and gemcitabine (50nM) in a 3D-spheroid assay.  $EC_{50}$  of verteporfin in 3D-spheroid and low crowding condition is also indicated. **C.** Inactivation of Hippo pathway restores sensitivity to verteporfin in 3D-spheroid assay. Dose response curve of Panc02 cells expressing control-shRNA or shRNA targeting *NF2*.  $EC_{50}$  for each condition is also indicated. Hippo pathway inactivation mildly increases cell growth of pancreatic cancer cells. **D.** Western blots showing expression of V5-YAPS6A in Panc10.05 and Panc02.13 cells. **E.** Western blots showing expression of YAPS6A and NF2 knockdown increases phosphorylation of S6 ribosomal protein. Blots were also probed with  $\beta$ -actin for loading control. **F.** Plot showing mRNA expression of YAP-TEAD target genes in Panc02 cells expressing GFP or YAPS6A in high crowding conditions. **G.** YAPS6A expression or NF2 depletion mildly increases cell growth in Panc02 cells. **H.** YAPS6A expression in Panc10.05 cells increases number of EdU-positive cell population in high crowding conditions.

**Fig. S5. Hippo pathway inactivation sensitizes cells to gemcitabine and 5-FU. A.** Hippo inactivation (YAPS6A) expression sensitizes Panc02 cells to 5-FU in high crowding conditions. **B.** YAPS6A expression increases apoptosis in gemcitabine treated Panc02 cells. Panc02 cells expressing YAPS6A or vector control were treated with varying doses of gemcitabine. Apoptosis was scored using nucview caspase 3/7 reagent. Plots show number of GFP positive (cleaved caspase3/7) cells upon gemcitabine treatment. **C.** Plot showing change in cell viability in gemcitabine treated Panc2 expressing vector or YAPS6A cells. **D.** YAPS6A expression sensitizes cells to gemcitabine in a soft agar colony formation assay. **E.** Hippo pathway inactivation increases action of several FDA-approved oncology drugs. Dose response curves of Panc02 cells expressing GFP or YAPS6A treated with 15 FDA-approved oncology drugs. **F.** Stability of gemcitabine in conditioned media over 5-day period. Plots showing gemcitabine and dFdU (**G**) from media-alone or from Panc02.13 cells collected over five days. Relative concentration of gemcitabine and dFdU was measured using LC/MS. **H.** Representative Multiple-Reaction Monitoring (MRM) Chromatograms of gemcitabine and dFdU from Pan02 or media only at day 1.

**Fig. S6. Hippo pathway inactivation decreases drug transport pumps. A.** Bar graph showing relative mRNA expression of ABCB4, ABCC3 and MVP in Panc02.13 cells expressing control-shRNA or NF2-shRNA. **B.** YAPS6A expression decreases expression of several transporters while the expression gemcitabine uptake pump (SLC29A1) remains unaffected. **C.** Protein levels of LRP and ABCG2 in Panc02.13 cells expressing YAPS6A, or vector control or NF2-shRNA. **D.** Western blots showing cell crowding-dependent changes in protein levels of ABCG2 and LRP. **E.** Hippo inactivation decreases levels of cytidine deaminase (CDA). YAPS6A expression in Panc1 cells decreases mRNA expression of CDA. mRNA expression of dCK remains unaffected. **F.** NF2 depletion in Patu8988S and YAPC cells decreases CDA levels. **G.** Western

blot showing expression of YAPS6A in Patu8902 cells decreases CDA protein levels. **H.** Verteporfin treatment increases mRNA expression of CDA in Panc02.13 cells. **I.** Gemcitabine resistant-MKN28 showed high levels of CDA. **J.** Western blots showing restoring LATS2 expression in H2052 mesothelioma cells increases CDA protein levels. The levels of dCK remain unchanged. **K.** LKB1 knockout cells showed decreased CDA levels. **L, M.** Plots showing normalized protein levels of phospho-YAP and CDA in A549 (*STK11* mut) and Calu-1 (*STK11*-WT) cells under various crowding conditions.

**Fig. S7. YAP activation sensitizes pancreatic tumors to gemcitabine in mouse xenograft models.** **A.** Gemcitabine treatment of YAPS6A expressing Panc02.13 xenografts showed significantly reduced tumor growth in nude mice. Parental (left) or YAPS6A expressing Panc02.13 cells (right) were subcutaneously injected into athymic mice. When the outgrowths were approximately 200 mm<sup>3</sup>, mice were divided at random into two groups (vehicle control, gemcitabine). **B.** Bar graph showing relative levels of cleaved caspase 7 and phosphor-H2aX in Miapaca2 xenografts. **C.** Poor correlation between gemcitabine response and tumor doubling time in PDX models ( $r=-0.07$ ). **D.** Plots showing tumor growth inhibition in response to other cytotoxic drugs is not affected by YAP levels ( $p>0.05$ ). **E.** High levels of Hippo-YAP downstream gene target is associated with prolonged patient survival in pancreatic cancers in two independent studies. Kaplan-Meier curves of overall survival of pancreatic cancer patients with low or high levels of YAP- TEAD downstream targets.

**Fig. S8. Hippo pathway inactivation correlates with better overall survival in pancreatic, lung and gastric cancers.** **A.** Kaplan–Meier plot of lung cancer patients with low or high levels of CTGF. **B.** Kaplan–Meier plot of gastric cancer patients treated with 5-FU-based chemotherapy with Hippo activation (levels of NF2, left) or hippo inactivation (levels of CTGF, right). **C.** Kaplan–Meier plots showing overall survival of pancreatic cancer patients with low or high levels of Hippo-YAP independent transporter gene signature. **D.** Drug modulating pumps and CDA levels are upregulated in pancreatic cancers. Plots showing increased relative expression levels of ABCC3, MVP and **(E)** CDA in pancreatic tumor samples compared with normal tissue. **F.** Levels of YAP-TEAD target genes are not altered in pancreatic tumor samples.





**Table S2. Pancreatic cancer cell lines with genetic and clinical characteristics used in the current study.**

| Cell line        | Source        | Cell type | Age | Gender | KRAS | p53   | p16       | Disease               | Differentiation |
|------------------|---------------|-----------|-----|--------|------|-------|-----------|-----------------------|-----------------|
| <b>Aspc1</b>     | Ascites       | Ductal    | 62  | Female | G12D | C135F | WT        | Adenocarcinoma        | Moderate-Well   |
| <b>BxPc3</b>     | Primary tumor | Ductal    | 16  | Female | WT   | Y220C | WT / Meth | Adenocarcinoma        | Moderate        |
| <b>Capan2</b>    | Liver met     | Ductal    | 56  | Male   | G12V | WT    | WT        | Adenocarcinoma        | Well            |
| <b>CFPAC1</b>    | Liver met     | Ductal    | 26  | Male   | G12V | C242R | WT / Meth | Adenocarcinoma        | Well            |
| <b>DANG</b>      | Primary tumor | Ductal    |     |        |      |       |           |                       | Well            |
| <b>MiapCa2</b>   | Primary tumor | Ductal    | 65  | Male   | G12C | R248W | HD        | Carcinoma             | Poor-Moderate   |
| <b>Panc02.13</b> | Primary tumor |           |     |        |      |       |           |                       |                 |
| <b>Panc08.13</b> | Primary tumor |           |     |        |      |       |           |                       |                 |
| <b>Panc1</b>     | Primary tumor | Ductal    | 56  | Male   | G12D | R273H | HD        | Epithelioid carcinoma | Poor            |

|                   |               |        |    |      |      |       |    |  |                |
|-------------------|---------------|--------|----|------|------|-------|----|--|----------------|
| <b>Panc10.05</b>  | Primary tumor |        |    | Male | G12D | I255N |    |  | Adenocarcinoma |
| <b>Patu8902</b>   | Primary tumor |        |    |      |      | C176S |    |  |                |
| <b>Patu8988-S</b> | Liver met     |        |    |      |      | P151S |    |  |                |
| <b>PNS-1</b>      | Primary tumor |        |    |      | G12R | K132Q | HD |  | Adenocarcinoma |
| <b>SW1990</b>     | Spleen        |        |    |      | G12D | WT    | HD |  | Moderate-Well  |
| <b>YAPC</b>       | Ascites       | Ductal | 43 | Male |      | H179R |    |  |                |

## References

1. Luckert K, *et al.* (2012) A dual array-based approach to assess the abundance and posttranslational modification state of signaling proteins. *Sci Signal* 5(206):pl1.
2. Goswami CP & Nakshatri H (2013) PROGgene: gene expression based survival analysis web application for multiple cancers. *Journal of clinical bioinformatics* 3(1):22.
3. Gao J, *et al.* (2013) Integrative analysis of complex cancer genomics and clinical profiles using the cBioPortal. *Science signaling* 6(269):pl1.
4. Gyórfy B, Surowiak P, Budczies J, & Lánczky A (2013) Online survival analysis software to assess the prognostic value of biomarkers using transcriptomic data in non-small-cell lung cancer. *PLoS one* 8(12):e82241.
5. Khor TO, *et al.* (2015) A patient-centric repository of PDX models for translational oncology research. *Cancer research* 75(15 Supplement):3219-3219.
6. Shi S-R, *et al.* (1999) Sensitivity and detection efficiency of a novel two-step detection system (PowerVision) for immunohistochemistry. *Applied Immunohistochemistry & Molecular Morphology* 7(3):201.
7. Bapiro TE, *et al.* (2011) A novel method for quantification of gemcitabine and its metabolites 2', 2'-difluorodeoxyuridine and gemcitabine triphosphate in tumour tissue by LC-MS/MS: comparison with <sup>19</sup>F NMR spectroscopy. *Cancer chemotherapy and pharmacology* 68(5):1243-1253.
8. Yang W, *et al.* (2013) Genomics of Drug Sensitivity in Cancer (GDSC): a resource for therapeutic biomarker discovery in cancer cells. *Nucleic acids research* 41(D1):D955-D961.

9. Hong SP, Wen J, Bang S, Park S, & Song SY (2009) CD44-positive cells are responsible for gemcitabine resistance in pancreatic cancer cells. *International journal of cancer* 125(10):2323-2331.
10. Duxbury MS, Ito H, Zinner MJ, Ashley SW, & Whang EE (2004) Inhibition of SRC tyrosine kinase impairs inherent and acquired gemcitabine resistance in human pancreatic adenocarcinoma cells. *Clinical cancer research* 10(7):2307-2318.
11. Huanwen W, *et al.* (2009) Intrinsic chemoresistance to gemcitabine is associated with constitutive and laminin-induced phosphorylation of FAK in pancreatic cancer cell lines. *Mol Cancer* 8(125):21.
12. Parsels LA, *et al.* (2009) Gemcitabine sensitization by checkpoint kinase 1 inhibition correlates with inhibition of a Rad51 DNA damage response in pancreatic cancer cells. *Molecular cancer therapeutics* 8(1):45-54.
13. Shi X, *et al.* (2002) Acquired resistance of pancreatic cancer cells towards 5-Fluorouracil and gemcitabine is associated with altered expression of apoptosis-regulating genes. *Oncology* 62(4):354-362.
14. Giovannetti E, Mey V, Danesi R, Mosca I, & Del Tacca M (2004) Synergistic cytotoxicity and pharmacogenetics of gemcitabine and pemetrexed combination in pancreatic cancer cell lines. *Clinical cancer research* 10(9):2936-2943.
15. Humbert M, *et al.* (2010) Masitinib combined with standard gemcitabine chemotherapy: in vitro and in vivo studies in human pancreatic tumour cell lines and ectopic mouse model. *PLoS One* 5(3):e9430.
16. Modrak DE, Leon E, Goldenberg DM, & Gold DV (2009) Ceramide regulates gemcitabine-induced senescence and apoptosis in human pancreatic cancer cell lines. *Molecular Cancer Research* 7(6):890-896.
17. Mori-Iwamoto S, *et al.* (2008) A proteomic profiling of gemcitabine resistance in pancreatic cancer cell lines. *Mol Med Rep* 1:429-434.

**Table S3. Presence of mutations/deletions in Hippo pathway genes in clinical studies of different cancer types.**

| Indication       | NF2 | STK11 | LATS2 | LATS1 |
|------------------|-----|-------|-------|-------|
| Melanoma         | 0   | 0     | 0     | 0     |
| Stomach          | 0   | 0     | 5     | 5     |
| Colon            | 0   | 0     | 0     | 0     |
| Lung             | 0   | 18    | 5.8   | 0     |
| Colon            | 0   | 0     | 0     | 0     |
| Uterine          | 0   | 0     | 5.4   | 0     |
| Esophageal       | 0   | 0     | 0     | 0     |
| Bladder          | 0   | 0     | 0     | 0     |
| Prostate         | 0   | 0     | 8.2   | 0     |
| Head & Neck      | 0   | 0     | 0     | 0     |
| Mesothelioma     | 30  | 0     | 0     | 0     |
| Kidney           | 7.5 | 0     | 0     | 0     |
| Pancreatic       | 5.6 | 0     | 0     | 0     |
| Ovarian          | 0   | 4.8   | 0     | 0     |
| Adenoid cyctic c | 0   | 0     | 0     | 15    |
| Lymphoid neopl   | 0   | 0     | 0     | 8     |

**Table S4. Characteristics of PDX models obtained from Champions TumorGraft® Database (<http://database.championsoncology.com/>)**

| Model    | Cancer type            | Histology                       | Tumor status | Harvest site | Disease | Age | Gender | Implanting t | Drug        | %TGI | YAP    |
|----------|------------------------|---------------------------------|--------------|--------------|---------|-----|--------|--------------|-------------|------|--------|
| CTG-0160 | NSCLC                  | Squamous cell carcinoma         | Primary      | Lung         | I       | 64  | Female | 9            | Carboplatin | 98   | Low    |
| CTG-0160 | NSCLC                  | Squamous cell carcinoma         | Primary      | Lung         | I       | 64  | Female | 9            | Carboplatin | 90   | Low    |
| CTG-0163 | NSCLC                  | Squamous cell carcinoma         | Primary      | Lung         | III     | 52  | Female | 15           | Carboplatin | 72   | Low    |
| CTG-0163 | NSCLC                  | Squamous cell carcinoma         | Primary      | Lung         | III     | 52  | Female | 15           | Carboplatin | 76   | Low    |
| CTG-0743 | NSCLC                  | Adenocarcinoma                  | Metastatic   | Bone         | IV      | 58  | Male   | 8            | Carboplatin | 74   | High   |
| CTG-0743 | NSCLC                  | Adenocarcinoma                  | Metastatic   | Bone         | IV      | 58  | Male   | 8            | Carboplatin | 87   | High   |
| CTG-0781 | Ovarian                |                                 | Primary      | Ovary        | IV      | 67  | Female |              | Carboplatin | 96   | Medium |
| CTG-0888 | Breast                 | Invasive ductal carcinoma       | Primary      | Breast       | III     | 43  | Female | 16           | Carboplatin | 104  | High   |
| CTG-0967 | Mesothelioma           | Epithelioid carcinoma           | Primary      | Pleura       | II      | 61  | Female | 5            | Carboplatin | -6   | Low    |
| CTG-0979 | NSCLC                  | Adenocarcinoma                  | Primary      | Lung         | II      | 57  | Female | 25           | Carboplatin | 69   | Low    |
| CTG-0979 | NSCLC                  | Adenocarcinoma                  | Primary      | Lung         | II      | 57  | Female | 25           | Carboplatin | 69   | Low    |
| CTG-0142 | Sarcoma [ Ewing sarcom | Small round blue cell carcinoma |              | Bone         |         | 17  | Male   |              | Cisplatin   | 100  | Low    |
| CTG-0143 | Sarcoma [ Ewing sarcom | Small round blue cell carcinoma |              | Bone marrow  |         | 22  | Male   |              | Cisplatin   | 100  | Medium |
| CTG-0160 | NSCLC                  | Squamous cell carcinoma         | Primary      | Lung         | I       | 64  | Female | 9            | Cisplatin   | 54   | Low    |
| CTG-0160 | NSCLC                  | Squamous cell carcinoma         | Primary      | Lung         | I       | 64  | Female | 9            | Cisplatin   | 0    | Low    |
| CTG-0160 | NSCLC                  | Squamous cell carcinoma         | Primary      | Lung         | I       | 64  | Female | 9            | Cisplatin   | 0    | Low    |
| CTG-0163 | NSCLC                  | Squamous cell carcinoma         | Primary      | Lung         | III     | 52  | Female | 15           | Cisplatin   | 118  | Low    |
| CTG-0163 | NSCLC                  | Squamous cell carcinoma         | Primary      | Lung         | III     | 52  | Female | 15           | Cisplatin   | 21   | Low    |
| CTG-0163 | NSCLC                  | Squamous cell carcinoma         | Primary      | Lung         | III     | 52  | Female | 15           | Cisplatin   | 41   | Low    |
| CTG-0743 | NSCLC                  | Adenocarcinoma                  | Metastatic   | Bone         | IV      | 58  | Male   | 8            | Cisplatin   | 100  | High   |
| CTG-0826 | Colorectal             | Adenocarcinoma                  | Metastatic   | Liver        | III     | 38  | Female | 8            | Cisplatin   | 92   | Medium |
| CTG-0888 | Breast                 | Invasive ductal carcinoma       | Primary      | Breast       | III     | 43  | Female | 16           | Cisplatin   | 104  | High   |
| CTG-0941 | Cholangiocarcinoma     | Squamous cell carcinoma         | Metastatic   | Liver        | IV      | 57  | Female | 15           | Cisplatin   | 84   | High   |
| CTG-0967 | Mesothelioma           | Epithelioid carcinoma           | Primary      | Pleura       | II      | 61  | Female | 5            | Cisplatin   | 63   | Low    |
| CTG-0979 | NSCLC                  | Adenocarcinoma                  | Primary      | Lung         | II      | 57  | Female | 25           | Cisplatin   | 94   | Low    |
| CTG-0011 | Cholangiocarcinoma     | Adenocarcinoma                  | Primary      | Bile duct    | III     | 74  | Male   | 7            | Gemcitabine | 96   | High   |
| CTG-0018 | Breast                 | Colloid carcinoma               | Metastatic   | Lymph node   | IV      | 48  | Female | 13           | Gemcitabine | 42   | Low    |
| CTG-0137 | Esophageal             | Adenocarcinoma                  | Metastatic   | Liver        | IV      | 56  | Male   | 6            | Gemcitabine | 71   | Low    |
| CTG-0142 | Sarcoma [ Ewing sarcom | Small round blue cell carcinoma |              | Bone         |         | 17  | Male   |              | Gemcitabine | 77   | Low    |
| CTG-0143 | Sarcoma [ Ewing sarcom | Small round blue cell carcinoma |              | Bone marrow  |         | 22  | Male   |              | Gemcitabine | 25   | Medium |
| CTG-0160 | NSCLC                  | Squamous cell carcinoma         | Primary      | Lung         | I       | 64  | Female | 9            | Gemcitabine | 0    | Low    |
| CTG-0163 | NSCLC                  | Squamous cell carcinoma         | Primary      | Lung         | III     | 52  | Female | 15           | Gemcitabine | 21   | Low    |
| CTG-0493 | Esophageal             | Adenocarcinoma                  | Metastatic   | Liver        |         |     | Male   |              | Gemcitabine | 55   | Low    |
| CTG-0676 | Esophageal             | Adenocarcinoma                  | Metastatic   | Liver        | IV      | 51  | Female | 11           | Gemcitabine | 100  | Medium |
| CTG-0743 | NSCLC                  | Adenocarcinoma                  | Metastatic   | Bone         | IV      | 58  | Male   | 8            | Gemcitabine | 100  | High   |
| CTG-0781 | Ovarian                |                                 | Primary      | Ovary        | IV      | 67  | Female |              | Gemcitabine | 85   | Medium |
| CTG-0791 | Ovarian                | Papillary serous adenocarcinon  | Metastatic   | Abdomen      | III     | 48  | Female | 7            | Gemcitabine | 106  | High   |
| CTG-0798 | Head and neck          | Ductal adenocarcinoma           | Metastatic   | Lung         | IV      | 37  | Male   | 21           | Gemcitabine | 81   | High   |

|          |                        |                                 |            |             |     |    |        |    |             |     |        |
|----------|------------------------|---------------------------------|------------|-------------|-----|----|--------|----|-------------|-----|--------|
| CTG-0826 | Colorectal             | Adenocarcinoma                  | Metastatic | Liver       | III | 38 | Female | 8  | Gemcitabine | 92  | Medium |
| CTG-0835 | Colorectal             | Adenocarcinoma                  | Metastatic | Liver       | IV  | 49 | Female | 15 | Gemcitabine | 40  | Low    |
| CTG-0888 | Breast                 | Invasive ductal carcinoma       | Primary    | Breast      | III | 43 | Female | 16 | Gemcitabine | 104 | High   |
| CTG-0941 | Cholangiocarcinoma     | Squamous cell carcinoma         | Metastatic | Liver       | IV  | 57 | Female | 15 | Gemcitabine | 84  | High   |
| CTG-0967 | Mesothelioma           | Epithelioid carcinoma           | Primary    | Pleura      | II  | 61 | Female | 5  | Gemcitabine | 63  | Low    |
| CTG-0979 | NSCLC                  | Adenocarcinoma                  | Primary    | Lung        | II  | 57 | Female | 25 | Gemcitabine | 77  | Low    |
| CTG-0018 | Breast                 | Colloid carcinoma               | Metastatic | Lymph node  | IV  | 48 | Female | 13 | Paclitaxel  | 52  | Low    |
| CTG-0142 | Sarcoma [ Ewing sarcom | Small round blue cell carcinoma |            | Bone        |     | 17 | Male   |    | Paclitaxel  | 100 | Low    |
| CTG-0143 | Sarcoma [ Ewing sarcom | Small round blue cell carcinoma |            | Bone marrow |     | 22 | Male   |    | Paclitaxel  | 0   | Medium |
| CTG-0160 | NSCLC                  | Squamous cell carcinoma         | Primary    | Lung        | I   | 64 | Female | 9  | Paclitaxel  | 58  | Low    |
| CTG-0160 | NSCLC                  | Squamous cell carcinoma         | Primary    | Lung        | I   | 64 | Female | 9  | Paclitaxel  | 98  | Low    |
| CTG-0160 | NSCLC                  | Squamous cell carcinoma         | Primary    | Lung        | I   | 64 | Female | 9  | Paclitaxel  | 90  | Low    |
| CTG-0160 | NSCLC                  | Squamous cell carcinoma         | Primary    | Lung        | I   | 64 | Female | 9  | Paclitaxel  | 91  | Low    |
| CTG-0163 | NSCLC                  | Squamous cell carcinoma         | Primary    | Lung        | III | 52 | Female | 15 | Paclitaxel  | 69  | Low    |
| CTG-0163 | NSCLC                  | Squamous cell carcinoma         | Primary    | Lung        | III | 52 | Female | 15 | Paclitaxel  | 72  | Low    |
| CTG-0163 | NSCLC                  | Squamous cell carcinoma         | Primary    | Lung        | III | 52 | Female | 15 | Paclitaxel  | 76  | Low    |
| CTG-0163 | NSCLC                  | Squamous cell carcinoma         | Primary    | Lung        | III | 52 | Female | 15 | Paclitaxel  | 94  | Low    |
| CTG-0676 | Esophageal             | Adenocarcinoma                  | Metastatic | Liver       | IV  | 51 | Female | 11 | Paclitaxel  | 53  | Medium |
| CTG-0743 | NSCLC                  | Adenocarcinoma                  | Metastatic | Bone        | IV  | 58 | Male   | 8  | Paclitaxel  | 74  | High   |
| CTG-0781 | Ovarian                |                                 | Primary    | Ovary       | IV  | 67 | Female |    | Paclitaxel  | 96  | Medium |
| CTG-0967 | Mesothelioma           | Epithelioid carcinoma           | Primary    | Pleura      | II  | 61 | Female | 5  | Paclitaxel  | -6  | Low    |
| CTG-0979 | NSCLC                  | Adenocarcinoma                  | Primary    | Lung        | II  | 57 | Female | 25 | Paclitaxel  | 69  | Low    |
| CTG-0137 | Esophageal             | Adenocarcinoma                  | Metastatic | Liver       | IV  | 56 | Male   | 6  | Sunitinib   | 91  | Low    |
| CTG-0137 | Esophageal             | Adenocarcinoma                  | Metastatic | Liver       | IV  | 56 | Male   | 6  | Sunitinib   | 85  | Low    |
| CTG-0493 | Esophageal             | Adenocarcinoma                  | Metastatic | Liver       |     |    | Male   |    | Sunitinib   | 0   | Low    |
| CTG-0493 | Esophageal             | Adenocarcinoma                  | Metastatic | Liver       |     |    | Male   |    | Sunitinib   | 59  | Low    |
| CTG-0493 | Esophageal             | Adenocarcinoma                  | Metastatic | Liver       |     |    | Male   |    | Sunitinib   | 55  | Low    |
| CTG-0676 | Esophageal             | Adenocarcinoma                  | Metastatic | Liver       | IV  | 51 | Female | 11 | Sunitinib   | 100 | Medium |
| CTG-0791 | Ovarian                | Papillary serous adenocarcinon  | Metastatic | Abdomen     | III | 48 | Female | 7  | Sunitinib   | 34  | High   |
| CTG-0826 | Colorectal             | Adenocarcinoma                  | Metastatic | Liver       | III | 38 | Female | 8  | Sunitinib   | 83  | Medium |
| CTG-0941 | Cholangiocarcinoma     | Squamous cell carcinoma         | Metastatic | Liver       | IV  | 57 | Female | 15 | Sunitinib   | 97  | High   |

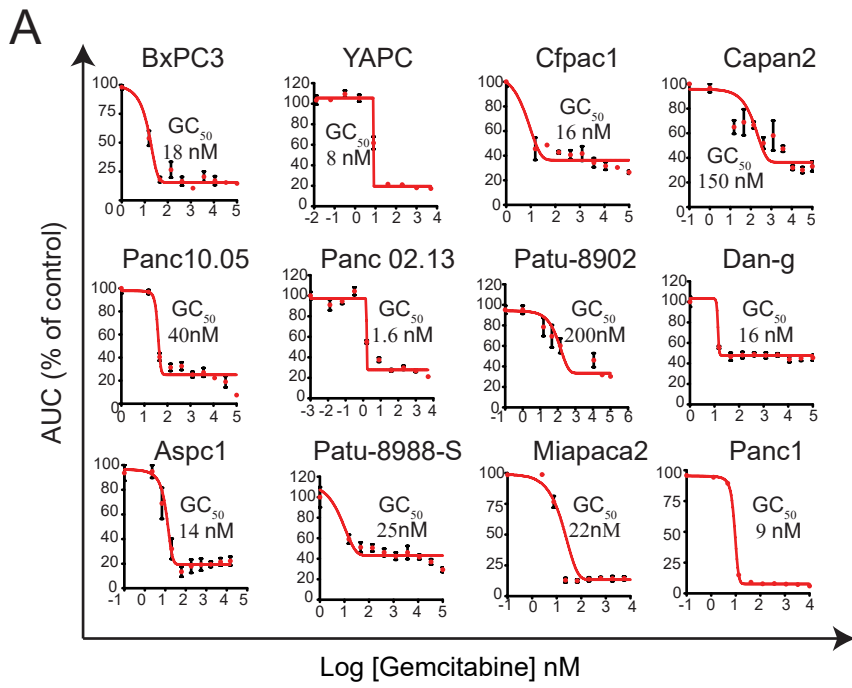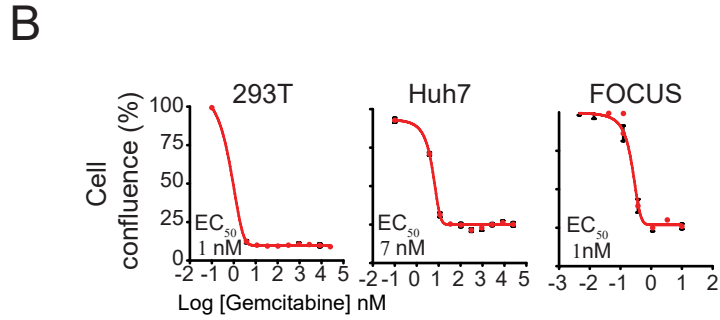

**C**

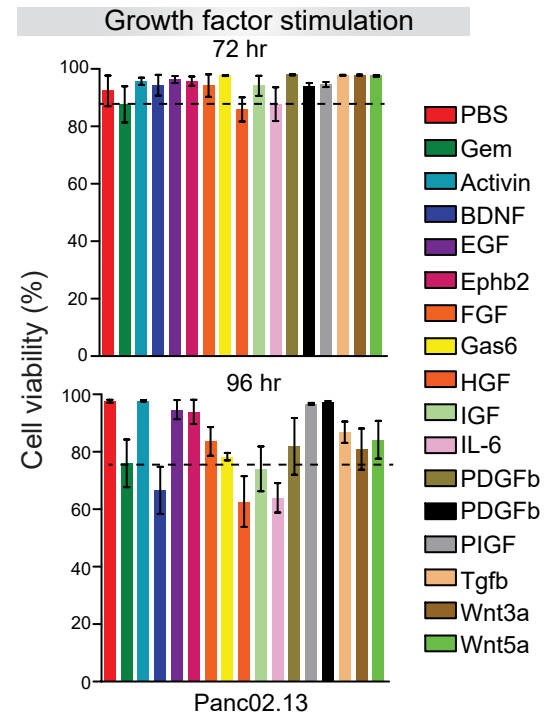

**D**

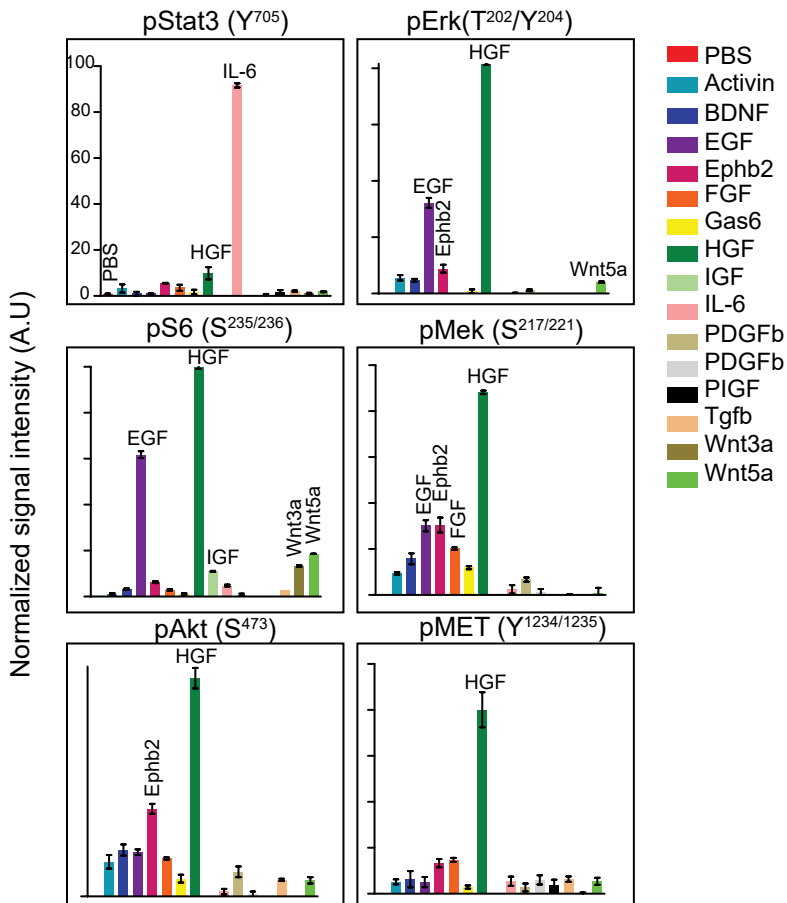

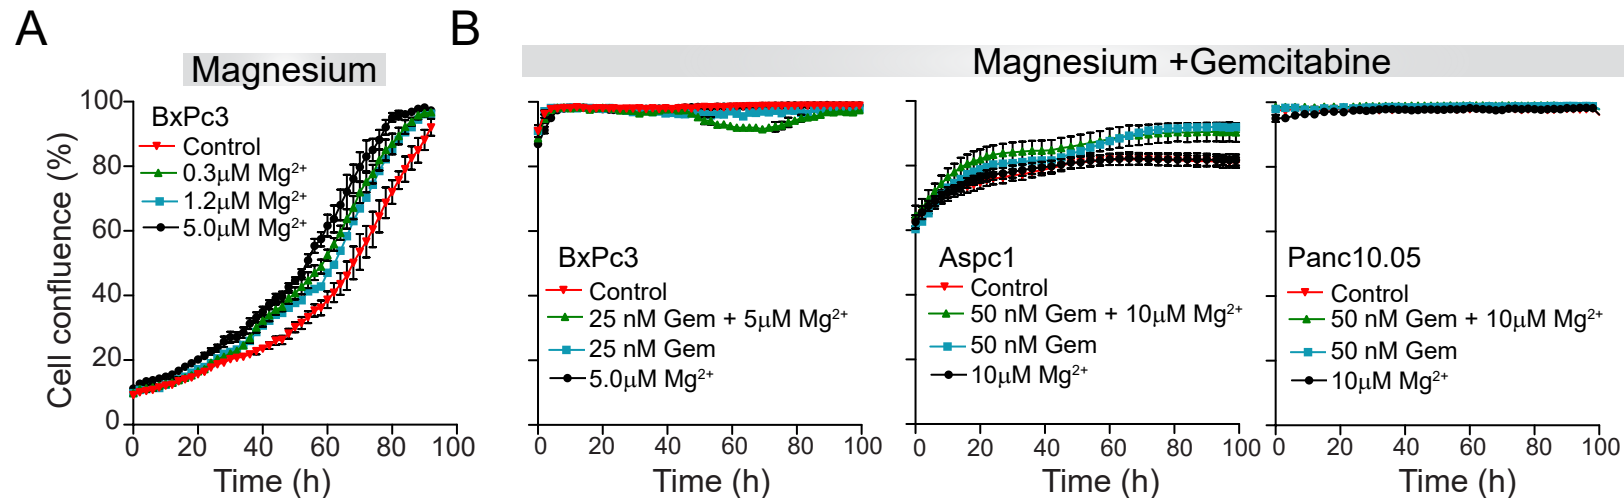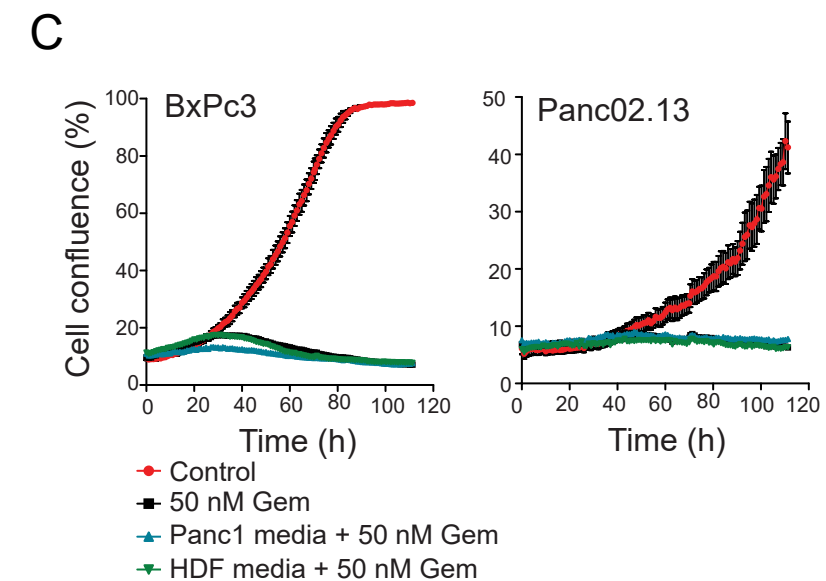

**D** **Co-culture-Gemcitabine response**

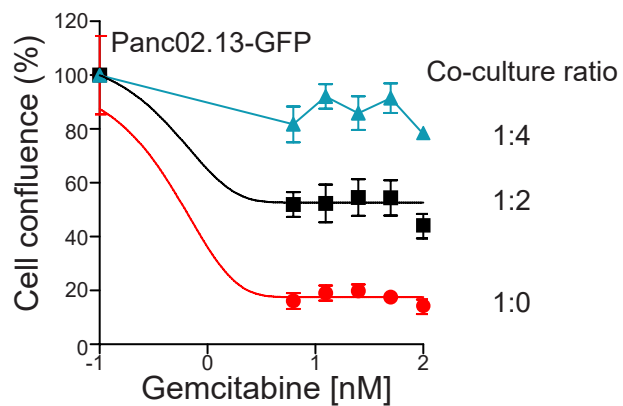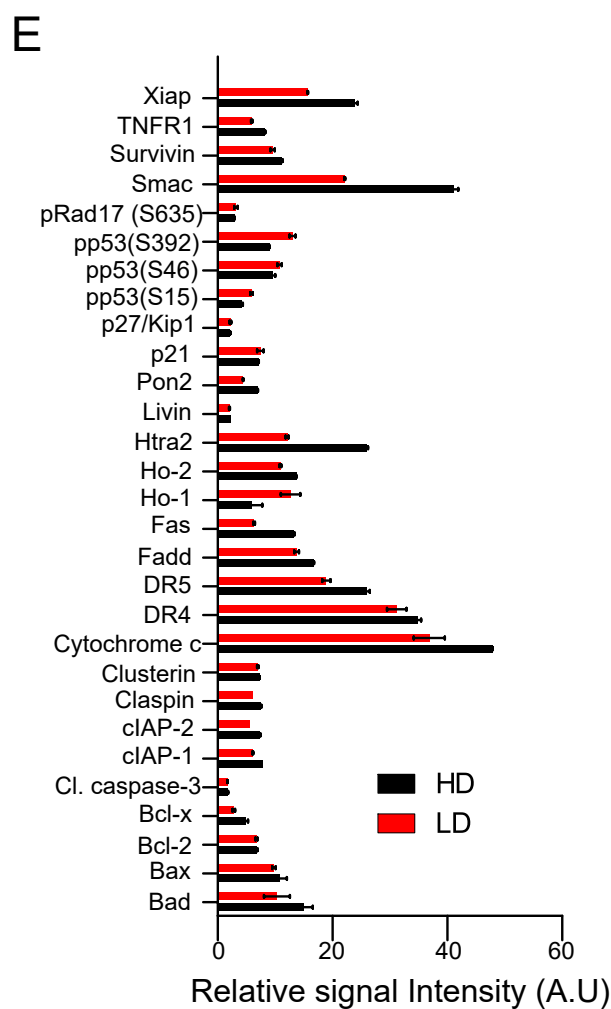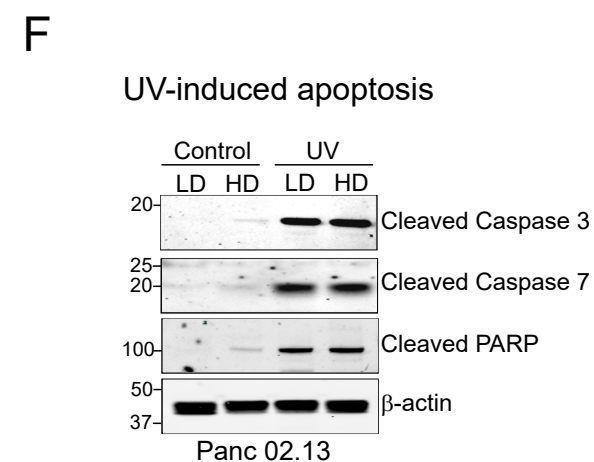



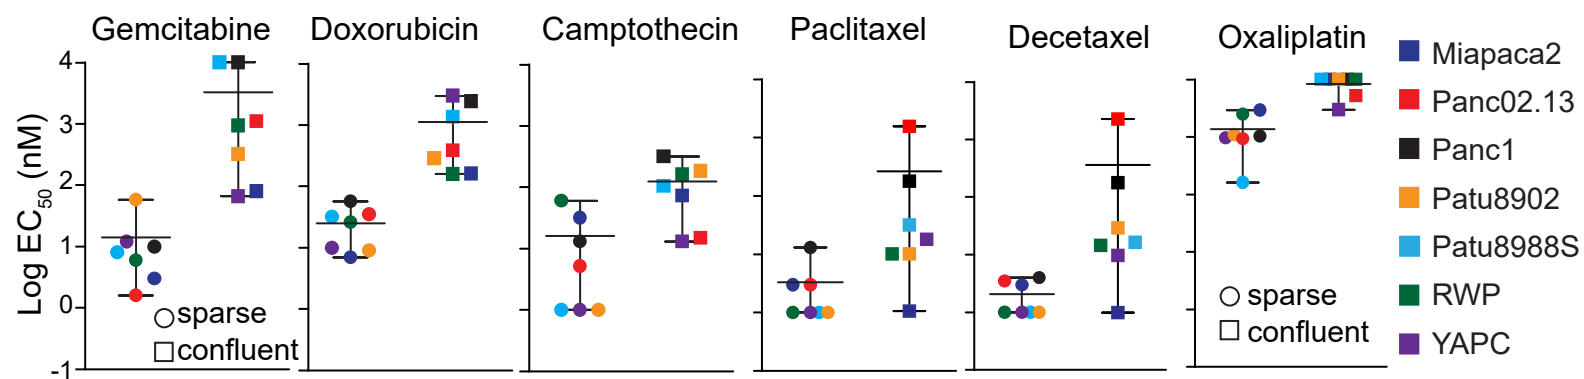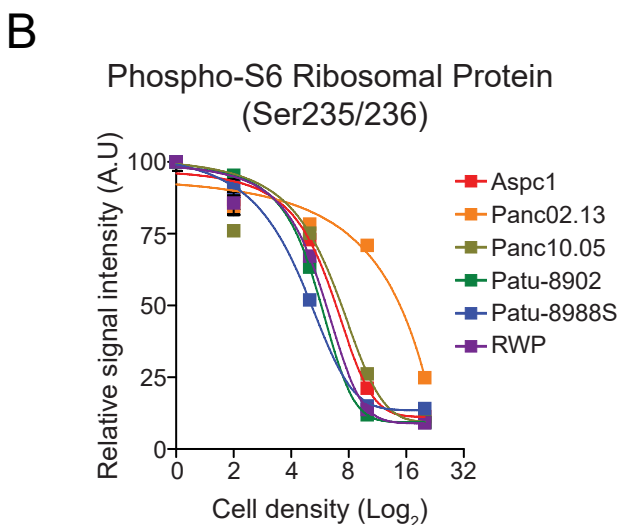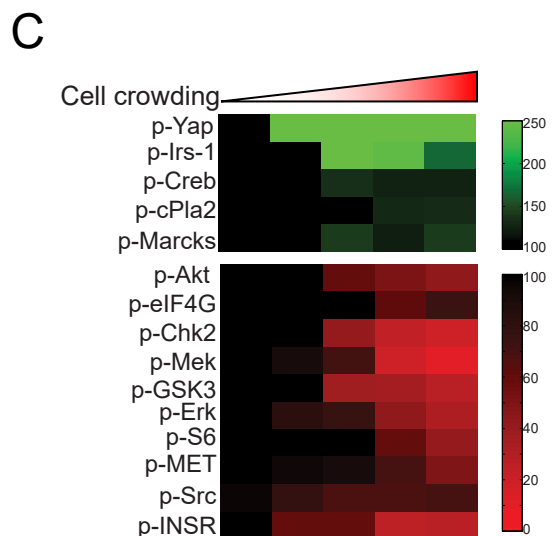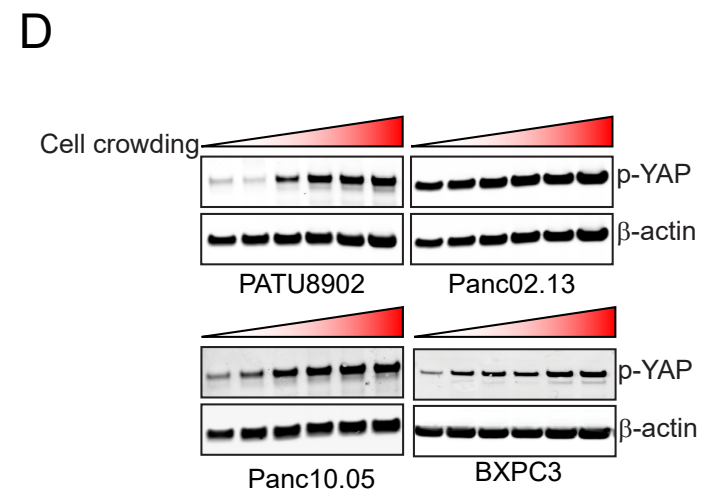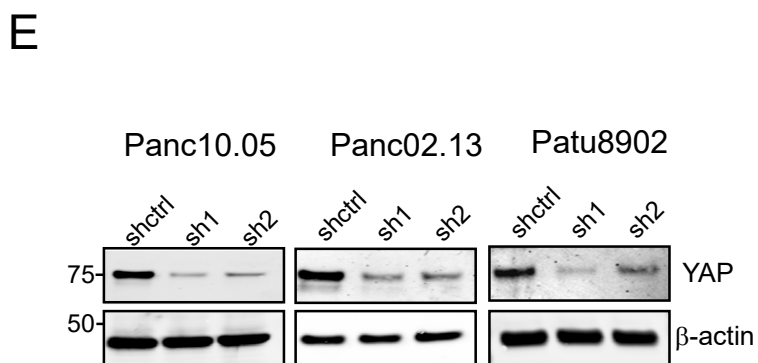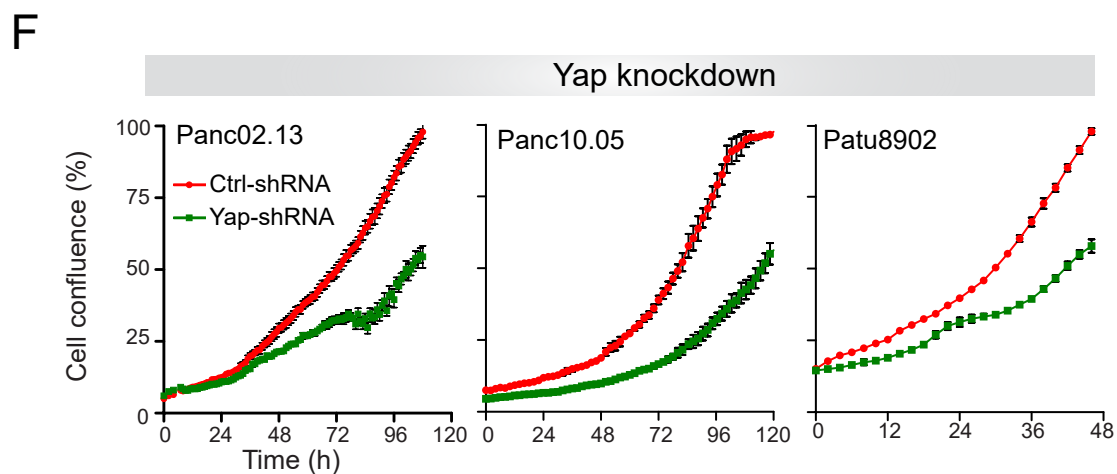

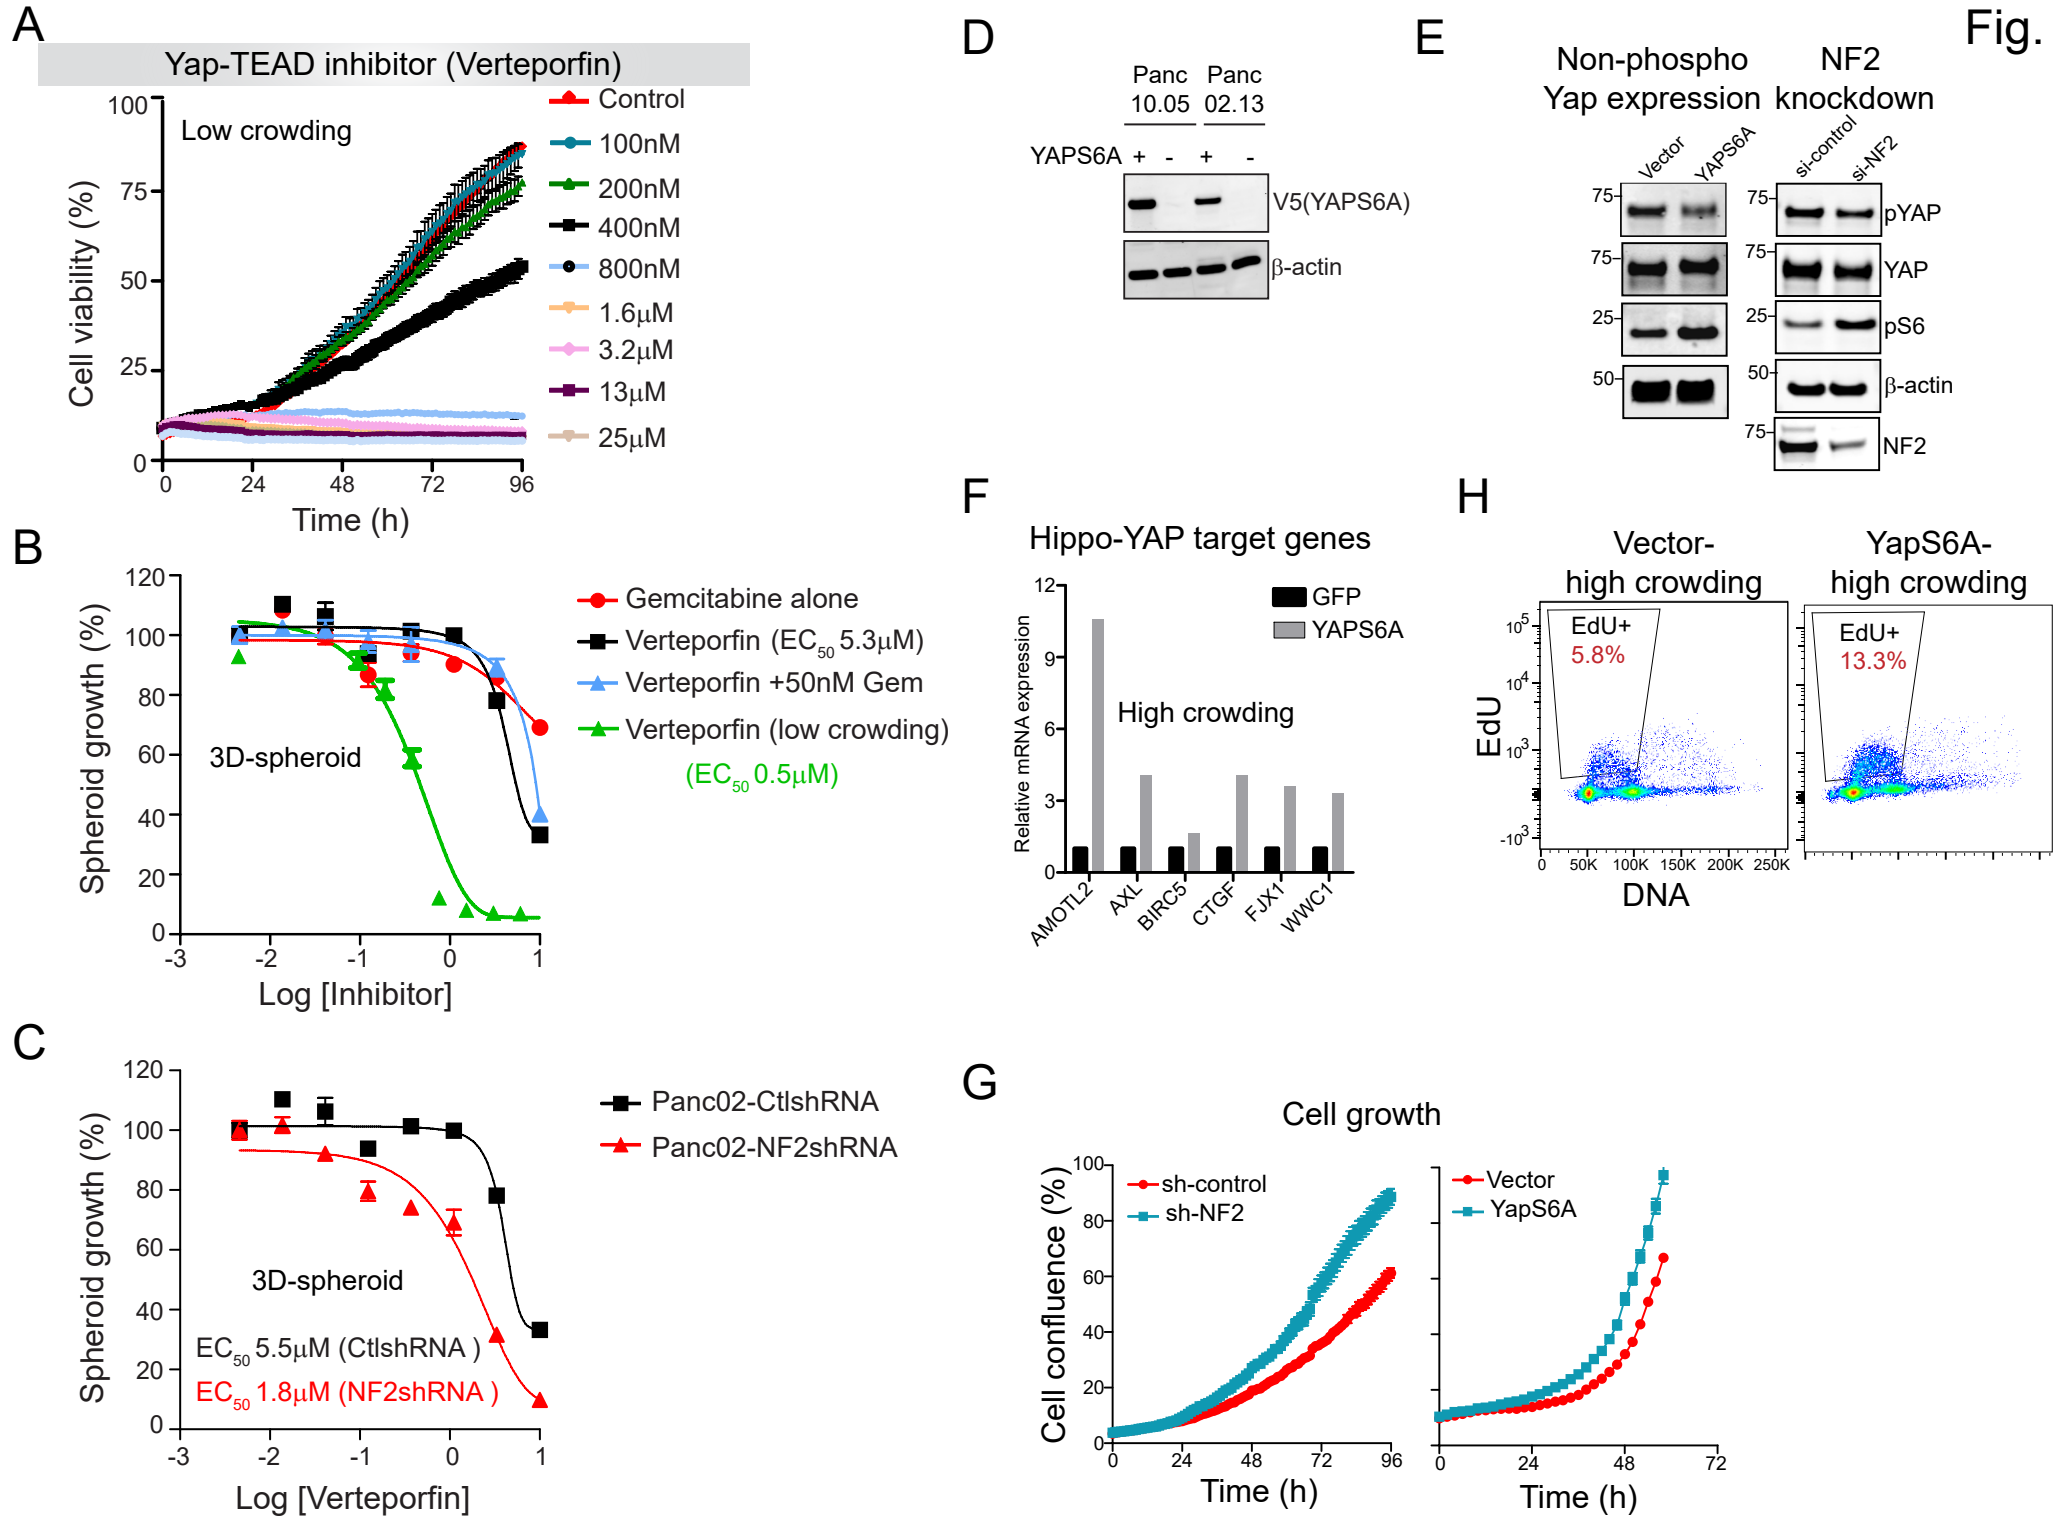

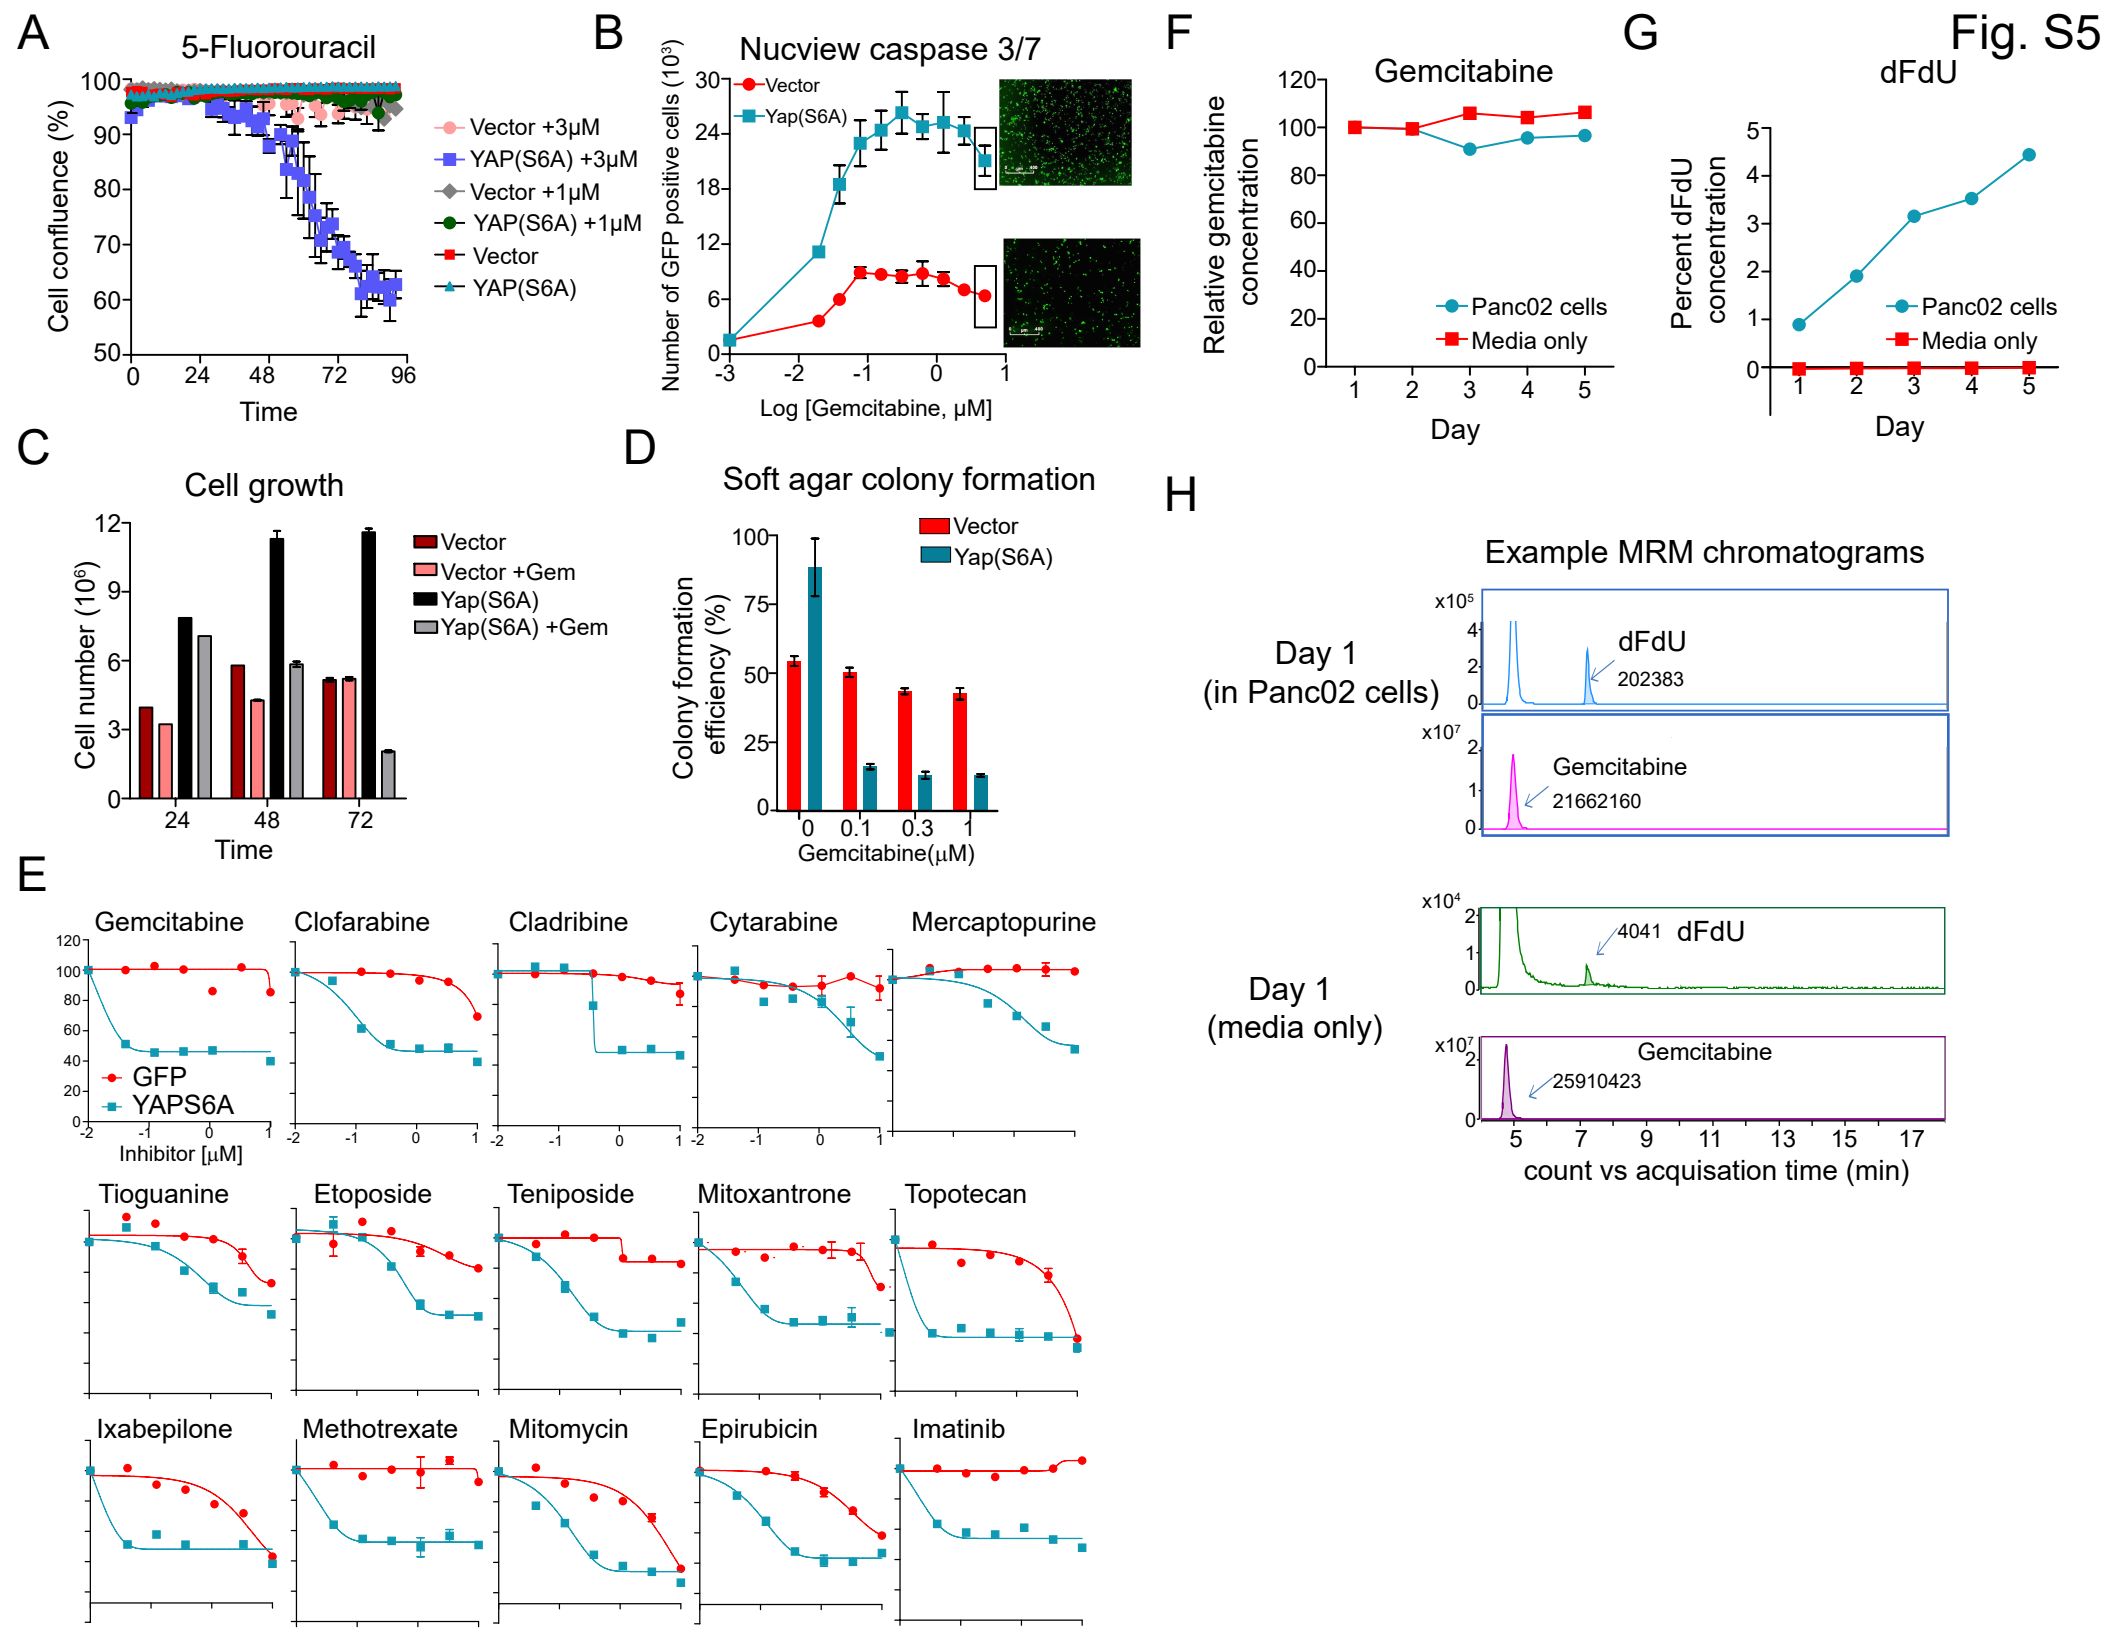

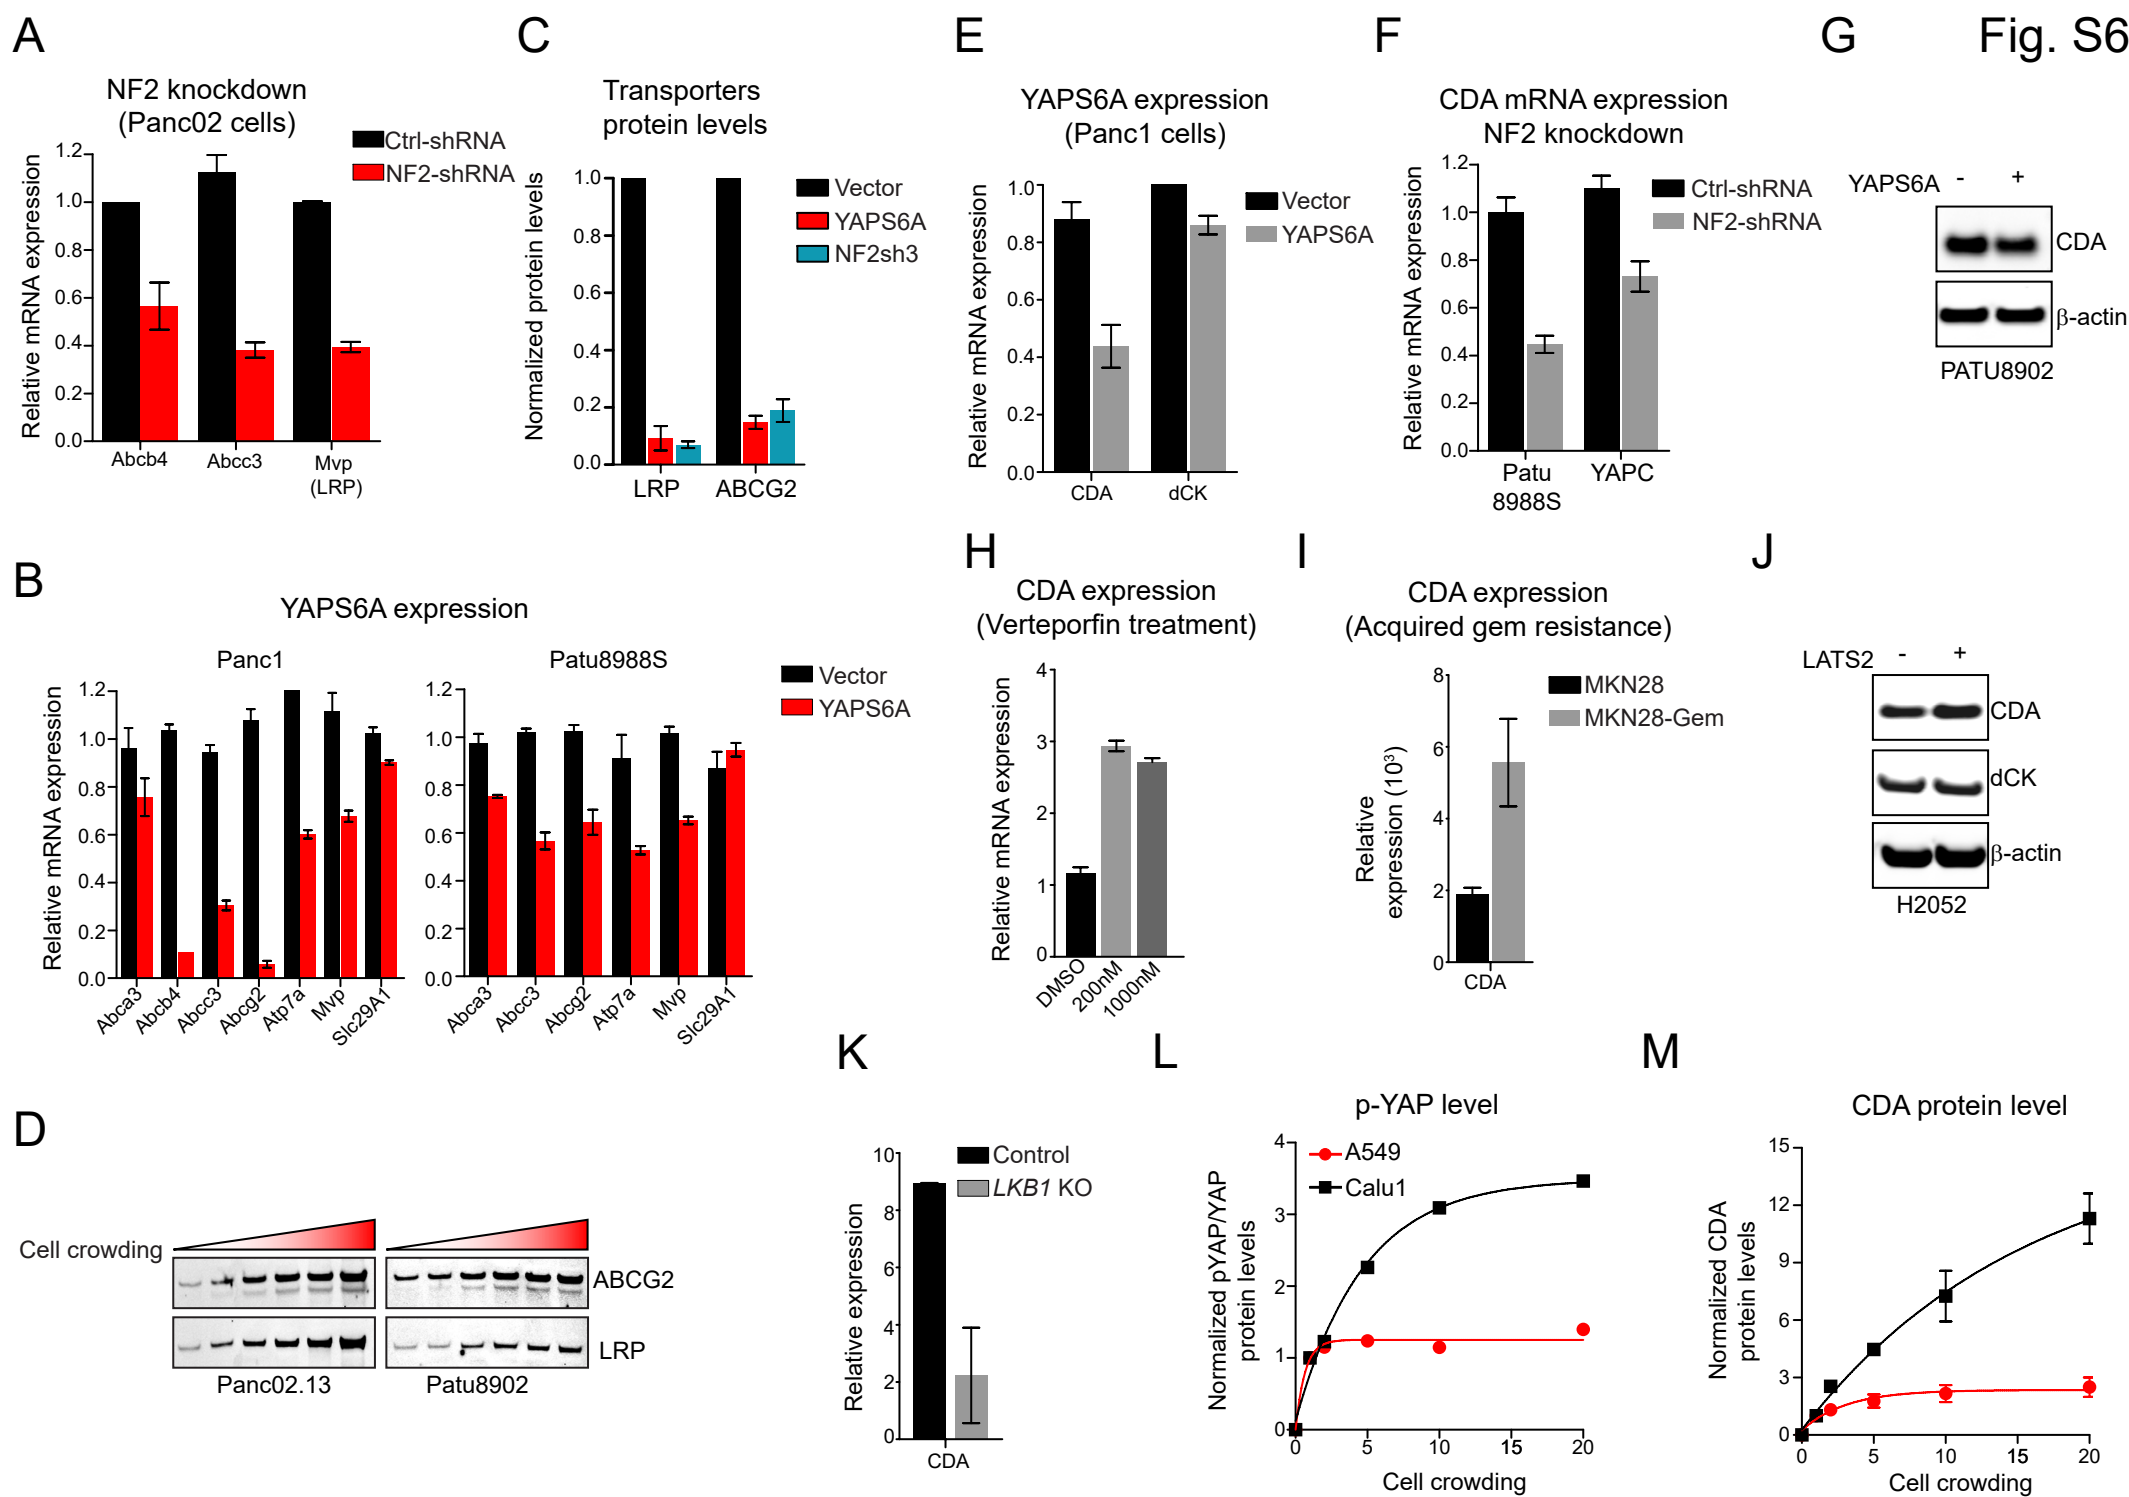

A

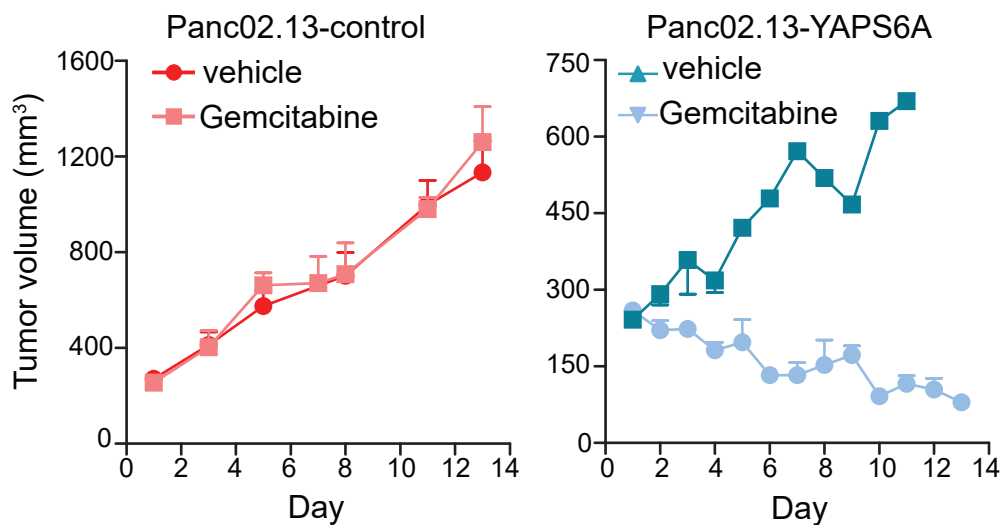

B

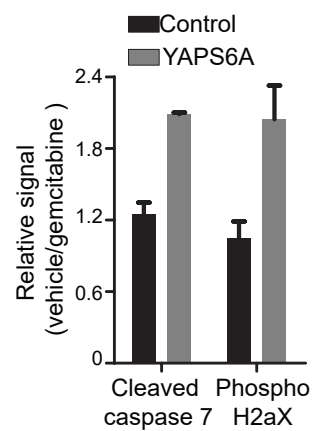

C

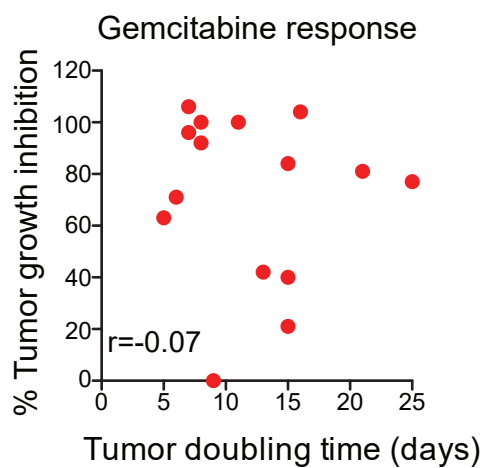

D

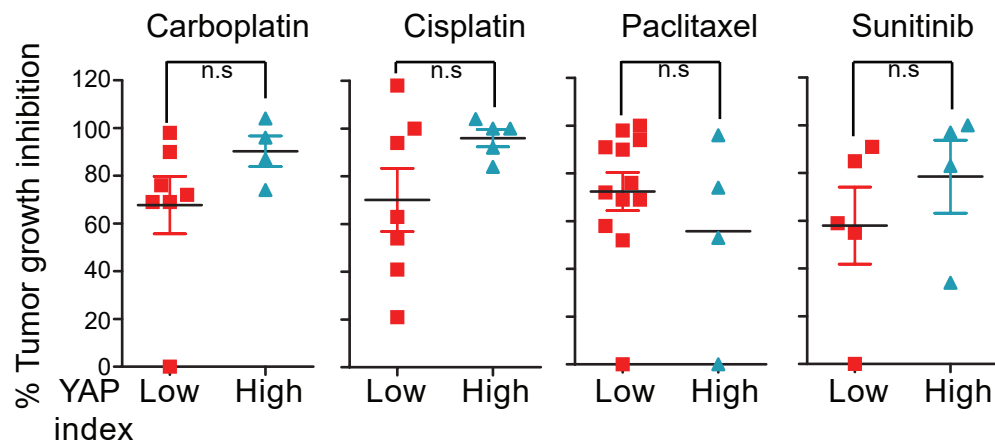

E

### Hippo inactivation gene signature (pancreatic cancer)

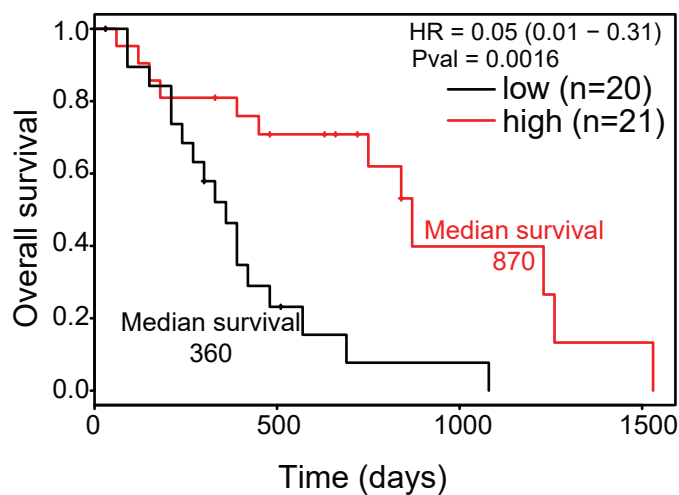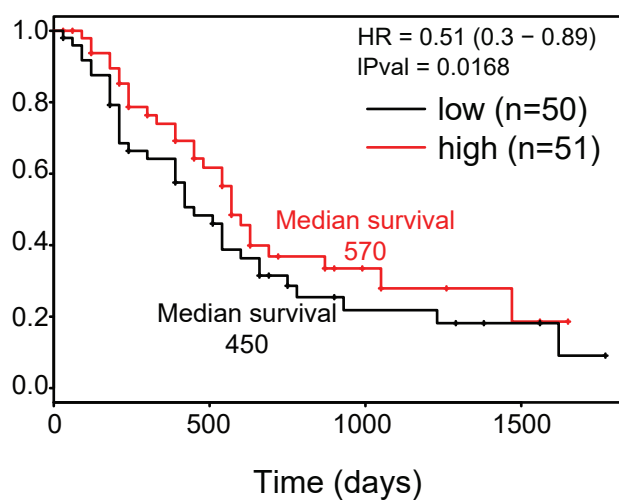

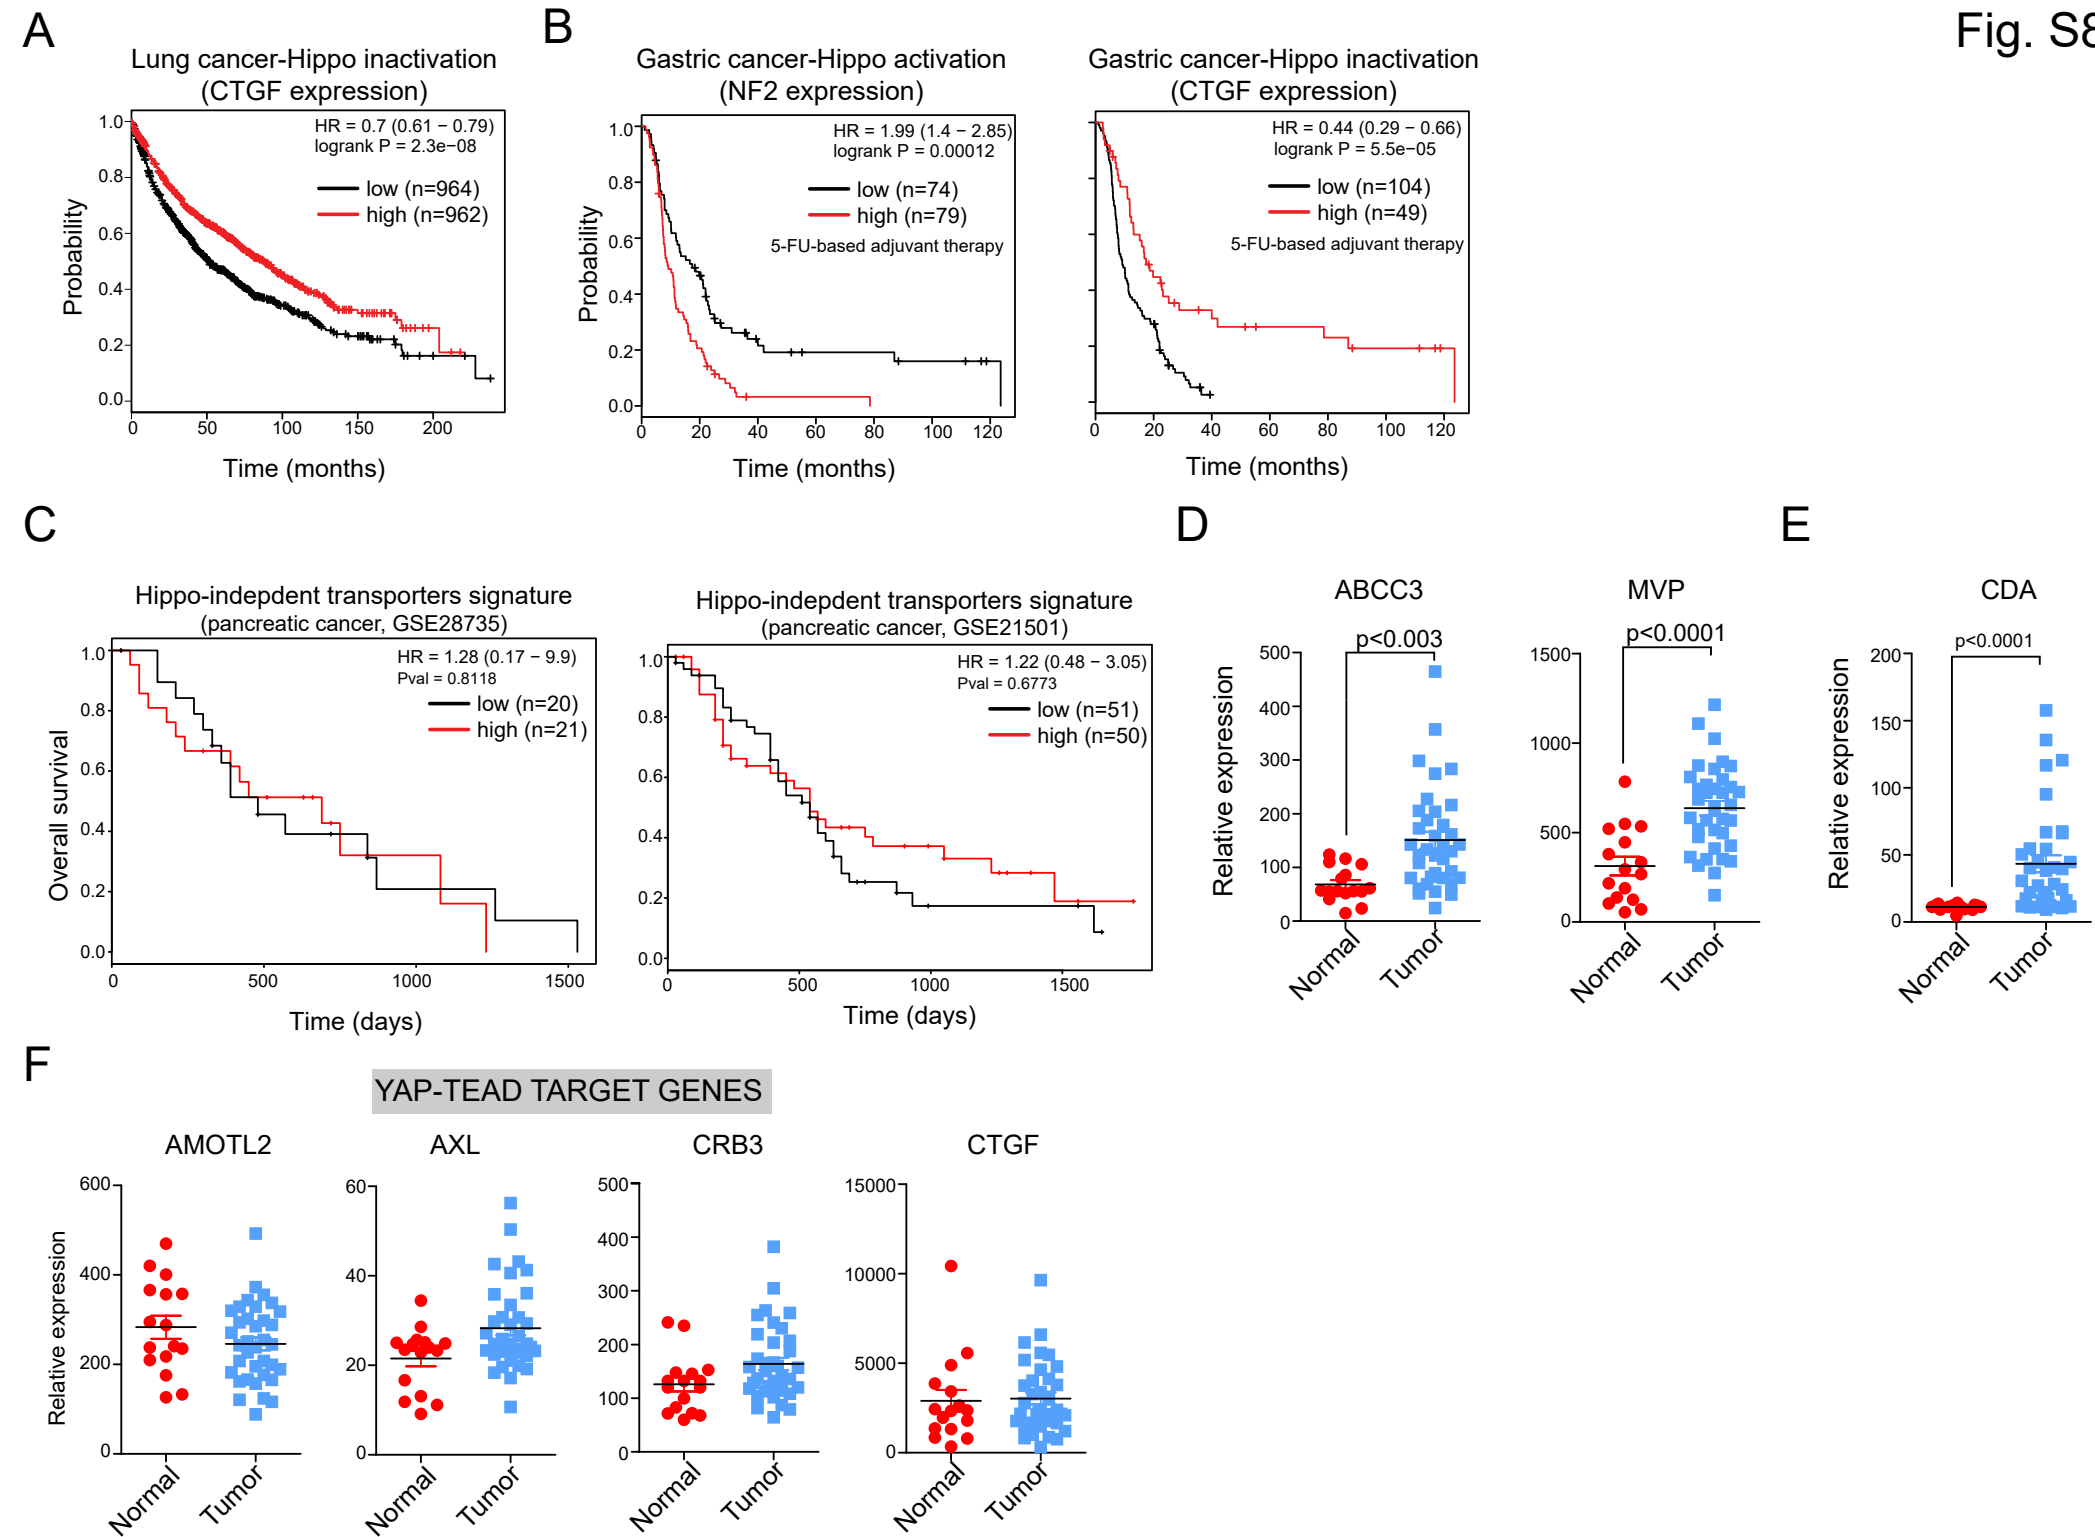

Supplement: pnas.1703096114.sapp.pdf [file pnas.1703096114.sapp.pdf]
